# Supplementary material
Source: PubMed Central journal article supplement (PMC8254790)
Supplement: NIHMS1694726-supplement-2.pdf [file NIHMS1694726-supplement-2.pdf]

**Supplementary Figures:**

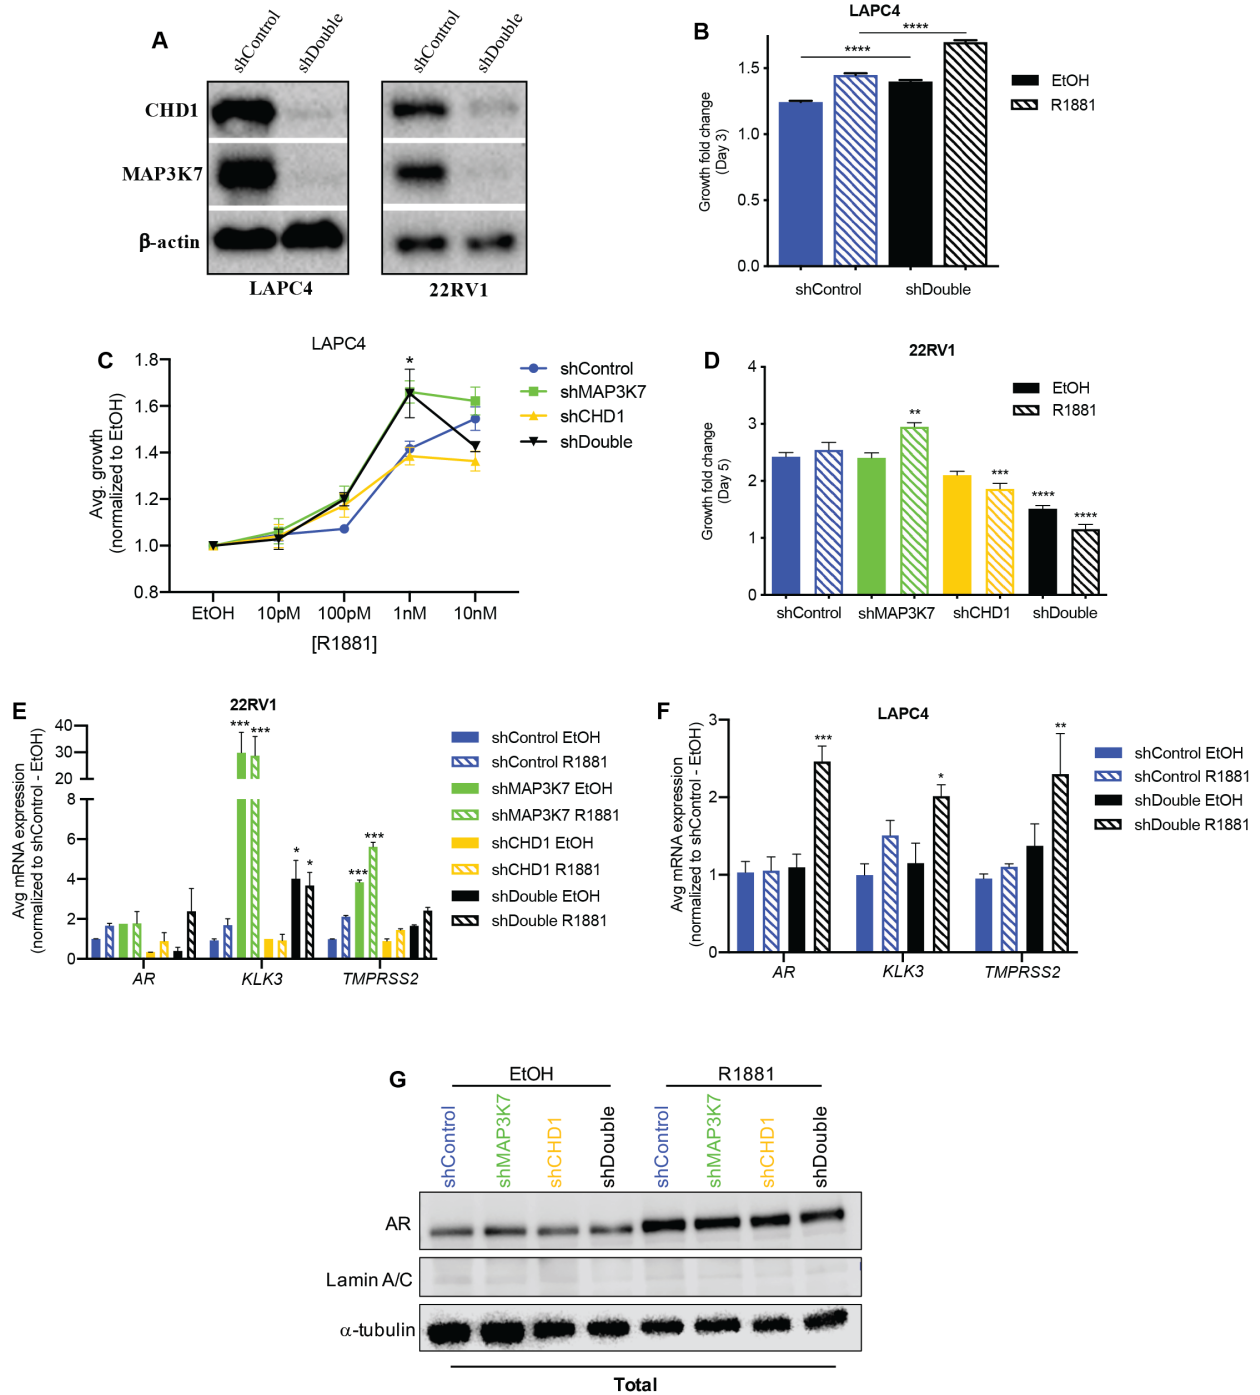

**Supplemental Figure S1. Increased AR activity in other PCa cell lines with knockdown of *MAP3K7* and *CHD1*.** (A) Western blot of shControl, shMAP3K7, shCHD1, and shMAP3K7-shCHD1 (shDouble) 22RV1 and LAPC4 cells. (B) Day 3 of growth assay for LAPC4 cells in

steroid-depleted medium  $\pm$  1 nM R1881 (n=3). **(C)** Day 5 of R1881 dose response curves for shControl, shMAP3K7, shCHD1, and shDouble LAPC4 cells normalized to EtOH treatment (n=3; p-values indicate comparison to shControl at respective doses). **(D)** Day 5 of growth assay for 22RV1 cells in steroid-depleted medium  $\pm$  1 nM R1881 (n=3; p-values indicate comparison to shControl EtOH). **(E)** RT-qPCR of *AR*, *KLK3* and *TMPRSS2* expression in 22RV1 or **(F)** LAPC4 cells cultured in steroid-depleted medium  $\pm$  EtOH or 1 nM R1881 for 4 hr. Ct values normalized to *B2M* (22RV1) or *HPRT1* (LAPC4) expression and then to shControl (n=3; p-values represent comparison to shControl EtOH). **(G)** Representative western blot of AR protein in total fractions isolated from LNCaP cell lysates after treatment with  $\pm$  1 nM R1881 for 4 hr. Samples are from the same experiment as nuclear fractions in **Fig. 1G**. Data represent mean  $\pm$  SEM; One-way ANOVA with Tukey's (B) or Dunnett's (D) multiple comparisons test, or two-way ANOVA with Dunnett's multiple comparisons test (C, E, F); \*=p<0.05; \*\*=p<0.01; \*\*\*=p<0.001; \*\*\*\*=p<0.0001.

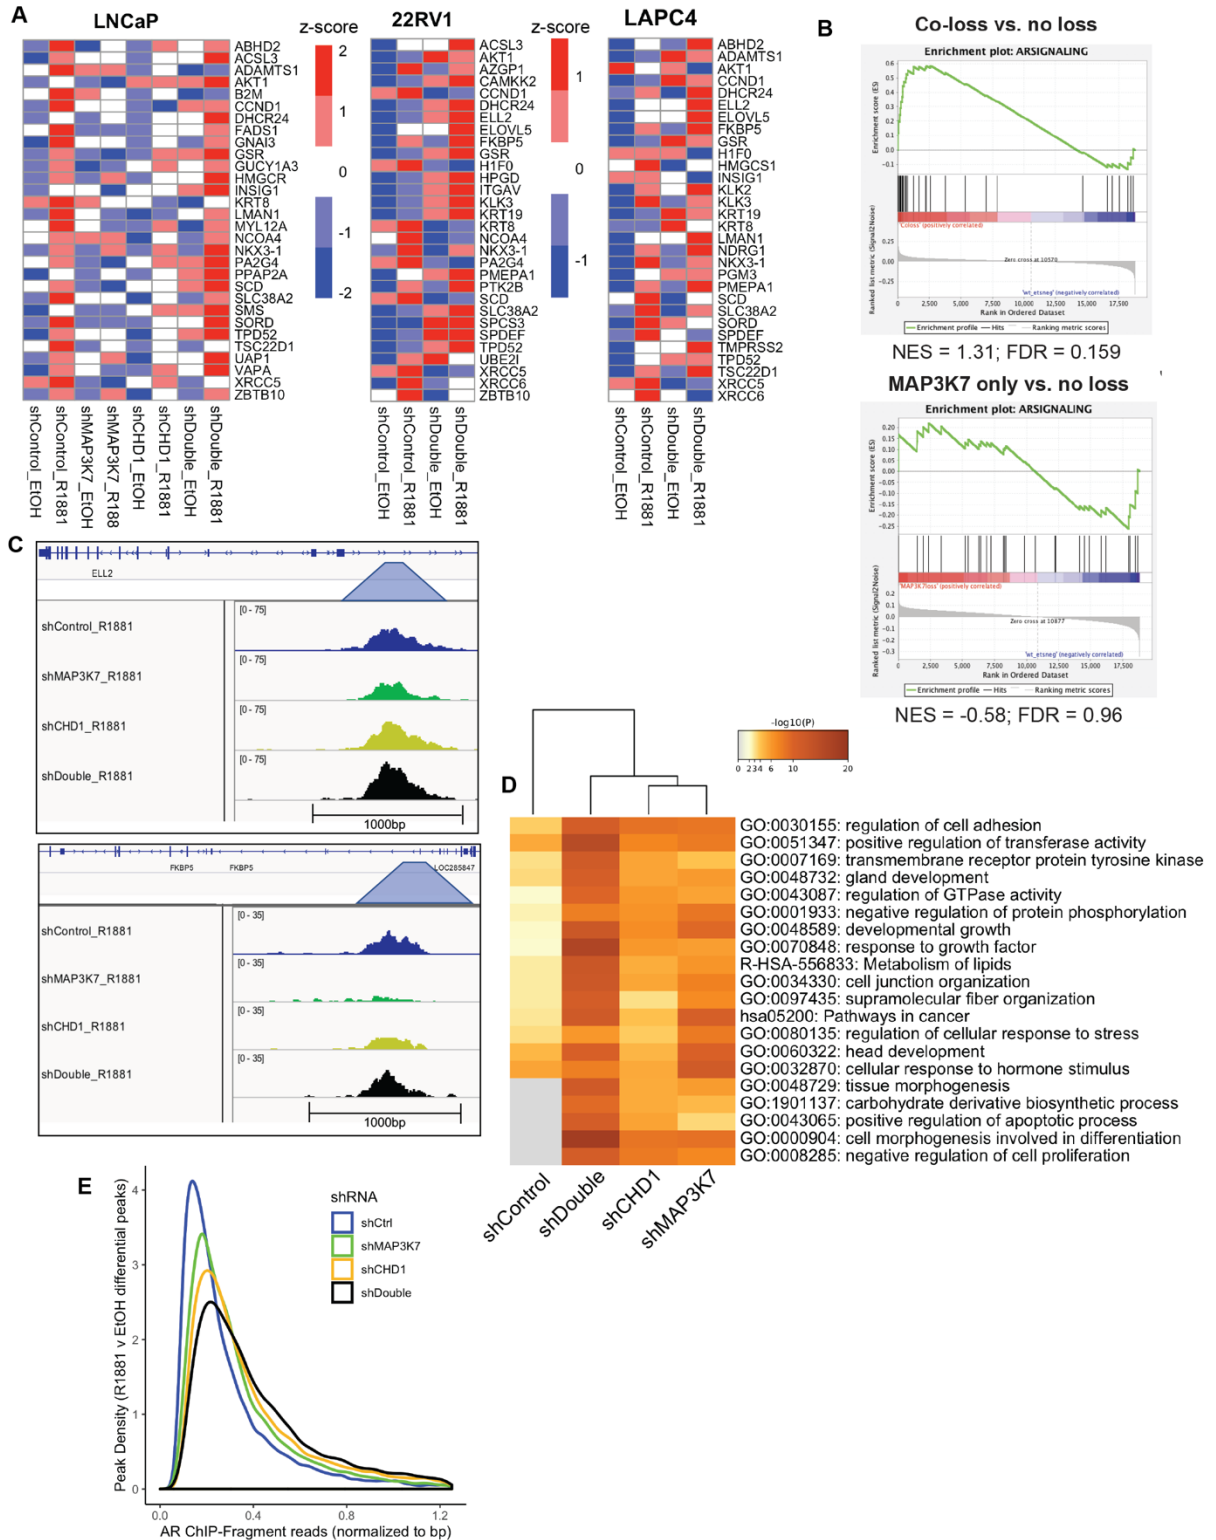

**Supplemental Figure S2. Suppression of *MAP3K7* and *CHD1* increases AR signature gene expression and androgen-induced AR chromatin binding. (A) Heatmap illustration of z-score**

expression changes of top 30 up-regulated AR signature genes (from MSigDB: M5908) in indicated cell types  $\pm$  1 nM R1881 for 4 hr. **(B)** GSEA of AR signaling gene signature in indicated MSKCC patient groups with copy number loss of *MAP3K7* or *MAP3K7* and *CHD1* versus patients with loss of neither. **(C)** IGV genome track images of AR ChIP-seq peaks at the *ELL2* (top) and *FKBP5* (bottom) loci. **(D)** Metascape pathway analysis of AR ChIP annotations with significant gene expression changes from Figure 2F-G. **(E)** Density plot of differential AR ChIP peaks (androgen-induced) between shControl, shMAP3K7, shCHD1, and shDouble R1881-treated versus respective EtOH-treated LNCaP cells (fold-change >4, Poisson p-value <1.00e-04).

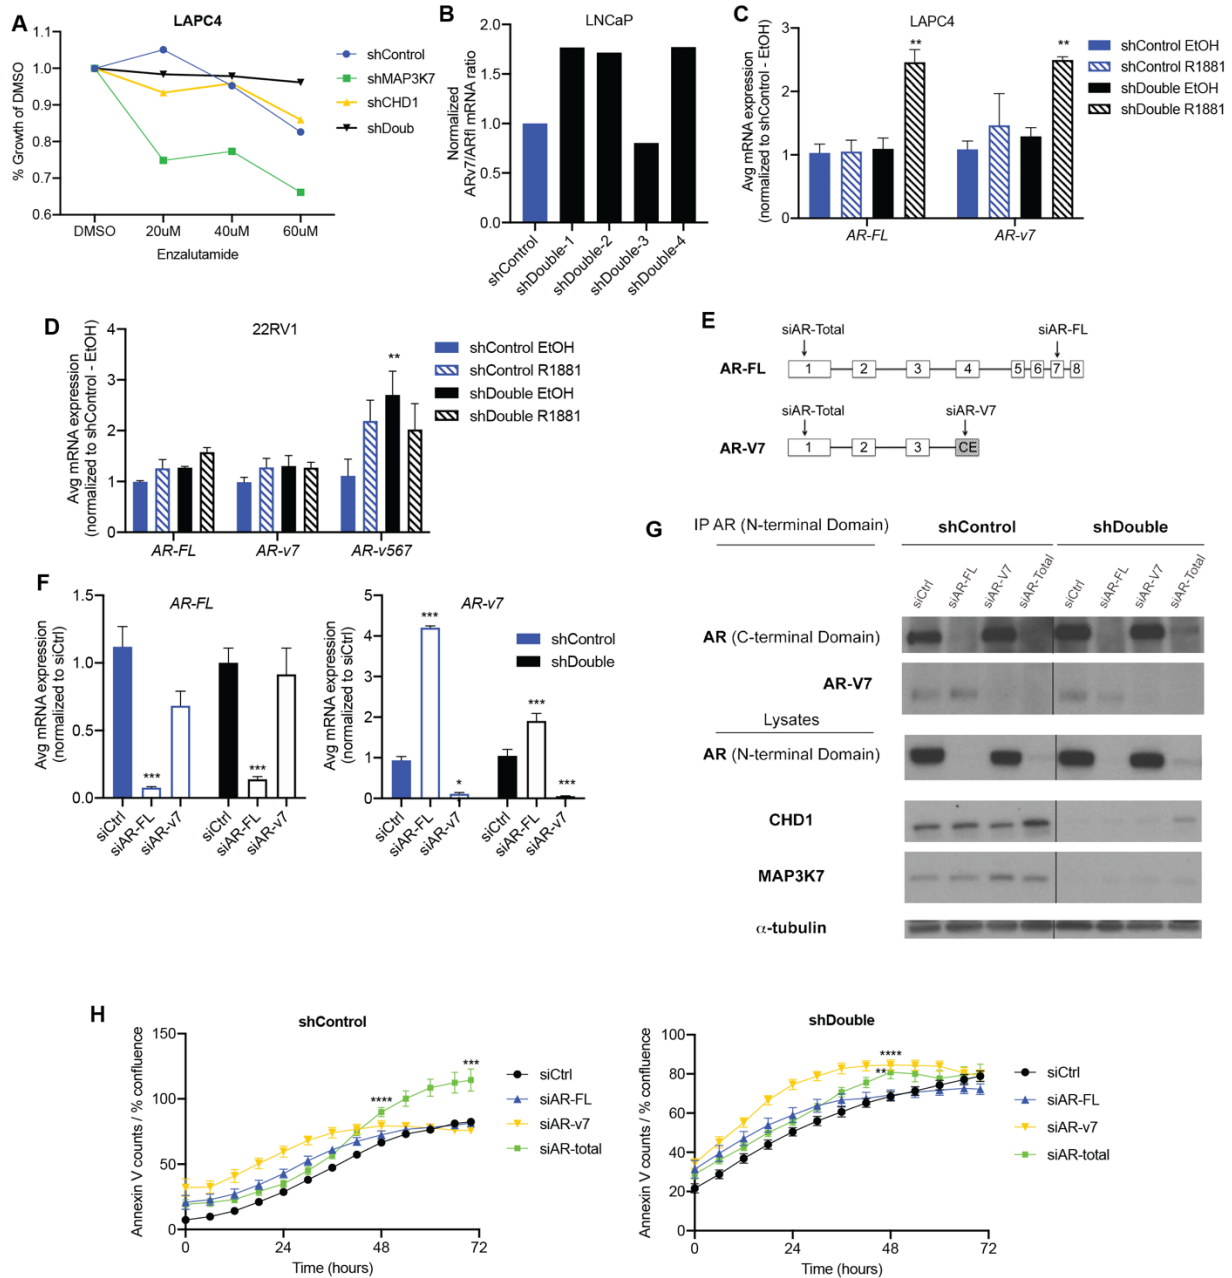

**Supplemental Figure S3. AR variant expression in LAPC4 and 22RV1 cells. (A)** Day 5 of growth assay for shControl and shDouble LAPC4 cells treated with 20-60  $\mu$ M enzalutamide in castration conditions, normalized to DMSO treatment (n=3). **(B)** RT-qPCR of *AR-FL* and *AR-v7* showing an *AR-v7/AR-FL* ratio in multiple shDouble shRNA combinations compared to shControl LNCaP cells. Ct values normalized to *B2M* expression. **(C)** RT-qPCR of full-length

AR (*AR-FL*) and *AR-v7* gene expression in indicated LAPC4 cells  $\pm$  1 nM R1881 for 4 h. Ct values normalized to *HPRT1* expression and then to shControl (n=3; p-values represent comparison to shControl EtOH). **(D)** RT-qPCR of full-length AR (*AR-FL*), *AR-v7*, and *AR-v567* gene expression in indicated 22RV1 cells  $\pm$  1 nM R1881 for 4 h. Ct values normalized to *B2M* expression and then to shControl (n=3; p-values represent comparison to shControl EtOH). **(E)** Schematic of siRNA targeting constructs against AR-full length, AR-v7, and total AR. **(F)** RT-qPCR verification of siAR-FL and siAR-v7 targeting constructs in shControl and shDouble LNCaP cells 72 hours after transfection (n=3; p-values indicate comparison to siCtrl). **(G)** Immunoprecipitation western blot verification of siRNA targeting constructs in LNCaP cells. IP using AR N-terminal antibody, immunoblot with AR-C-terminal and AR-v7 antibodies. **(H)** Annexin V counts normalized to cell confluence of shControl (left) and shDouble (right) LNCaP cells in castration conditions beginning 24 hours after transfection with indicated siRNAs (n=3; p-values indicate comparison to siCtrl). Data represent mean  $\pm$  SEM; two-way ANOVA with Dunnett's multiple comparisons test (C, D, F, H); \*= $p < 0.05$ ; \*\*= $p < 0.01$ ; \*\*\*= $p < 0.001$ ; \*\*\*\*= $p < 0.0001$ .

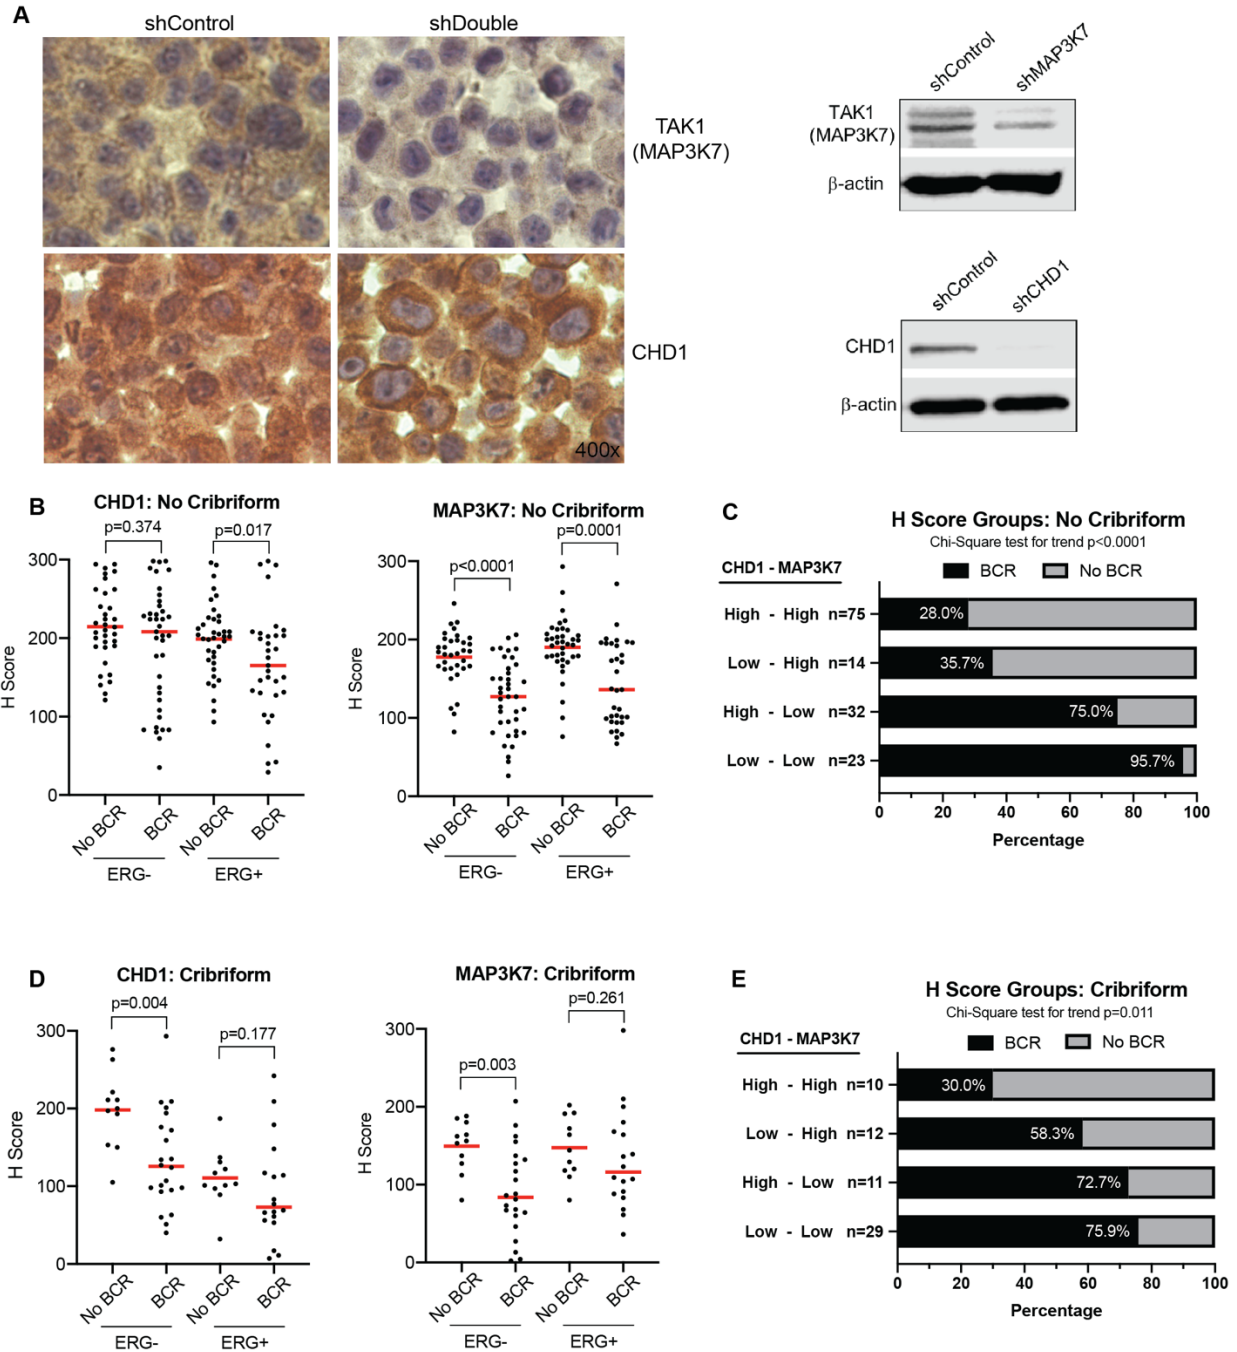

**Supplemental Figure S4. MAP3K7 and CHD1 IHC expression in cribriform PCa.**

(A) Verification of antibodies in indicated LNCaP cells via immunocytochemistry (left) and western blotting (right). (B) CHD1 and MAP3K7 immunohistochemical H-scores for 152 cases with no cribriform patterning. Cases are stratified by nuclear ERG positivity and then by

biochemical recurrence (BCR) or no BCR. (C) Frequency of BCR in non-cribriform cases with indicated combinations of high (>150) and low (<150) H-scores for MAP3K7 and CHD1. (D) CHD1 and MAP3K7 immunohistochemical H-scores for 62 cases with cribriform patterning. Cases are stratified by nuclear ERG positivity and then by biochemical recurrence (BCR) or no BCR. (E) Frequency of BCR in cribriform cases with indicated combinations of high (>150) and low (<150) H-scores for MAP3K7 and CHD1. Red bars (B, D) denote means. Wilcoxon rank sum test (B, D), Chi-Square test for trend (C, E).

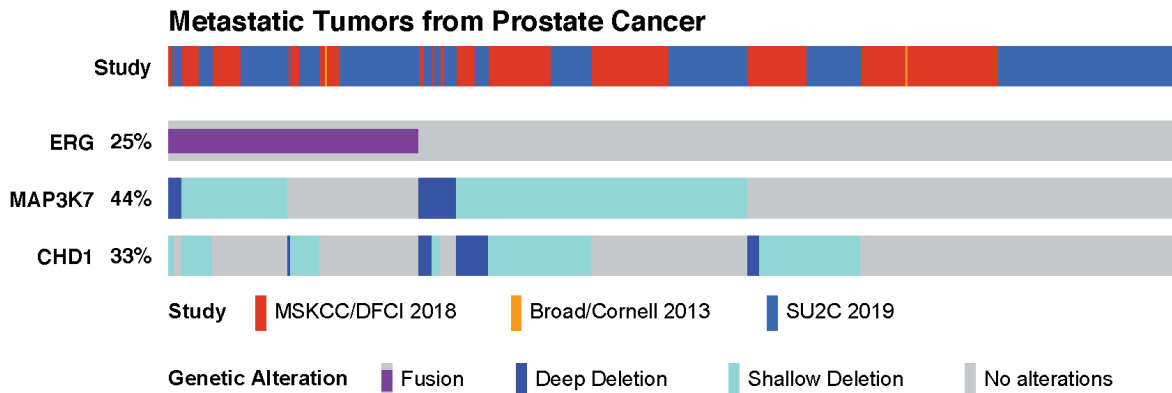

**Supplemental Figure S5. Patient genomics meta-analysis of *MAP3K7* and *CHD1* deletions in metastatic PCa.** Meta-analysis of multiple PCa genomic databases displaying frequency of *ERG* fusions and deletions of *MAP3K7* and *CHD1* in 753 metastatic PCa cases.



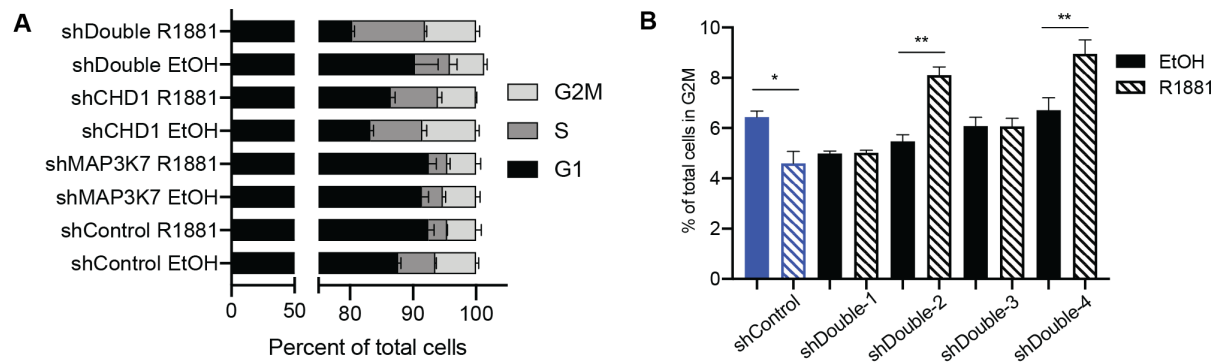

**Supplemental Figure S6. Suppression of *MAP3K7* and *CHD1* alters progression through the cell cycle.** (A) Flow cytometry cell cycle analysis of indicated LNCaP cells after 48 hours in steroid-depleted medium  $\pm$  1 nM R1881 showing percent of total cells in each cell stage (G1, S, G2M) (n=3). (B) Percent of cells in G2M cell stage for multiple shDouble shRNA construct combination (n=3). Data represent mean  $\pm$  SEM; One-way ANOVA with Tukey's multiple comparisons test (B); \*= $p < 0.05$ ; \*\*= $p < 0.01$ .
